# Supplementary material for: Dose-Response Meta-Analysis of Antipsychotic Drugs for Acute Schizophrenia
Source: Atypon-hosted journal article supplement (doi:10.1176/appi.ajp.2019.19010034), 2019-12-16
Supplement: ajp_19010034_correction01.pdf [file ajp_19010034_correction01.pdf]

## **Correction to Leucht et al.**

When the article “Dose-Response Meta-Analysis of Antipsychotic Drugs for Acute Schizophrenia,” by Stefan Leucht et al. (doi: 10.1176/appi.ajp.2019.19010034) was published online on December 16, 2019, the 95% effective dose for asenapine was reported correctly as 15 mg/day in the abstract and in Table 1 but was misreported in the Results section of the main text. The text was corrected and the article was reposted on January 23, 2020.
